# Supplementary material for: Exercise‐induced α‐ketoglutaric acid stimulates muscle hypertrophy and fat loss through OXGR1‐dependent adrenal activation
Source: PubMed Central journal article supplement (PMC7110140; doi:10.15252/embj.2019103304), 2020-02-27
Supplement: EMBJ-39-e103304-s001.pdf [file EMBJ-39-e103304-s001.pdf]

1  **$\alpha$ -ketoglutaric acid stimulates muscle hypertrophy and fat loss through**

2 **OXGR1-dependent adrenal activation**

3

4 Yexian Yuan<sup>1,9</sup>, Pingwen Xu<sup>3,9</sup>, Qingyan Jiang<sup>1,2,9</sup>, Xingcai Cai<sup>1</sup>, Tao Wang<sup>1</sup>, Wentong Peng<sup>1</sup>,

5 Jiajie Sun<sup>1</sup>, Canjun Zhu<sup>1</sup>, Cha Zhang<sup>1</sup>, Dong Yue<sup>1</sup>, Zhihui He<sup>1</sup>, Jinping Yang<sup>1</sup>, Yuxian Zeng<sup>1</sup>,

6 Man Du<sup>1</sup>, Fenglin Zhang<sup>1</sup>, Lucas Ibrahimi<sup>3</sup>, Sarah Schaul<sup>3</sup>, Yuwei Jiang<sup>4</sup>, Jiqui Wang<sup>5</sup>, Jia

7 Sun<sup>6</sup>, Qiaoping Wang<sup>7</sup>, Liming Liu<sup>8</sup>, Songbo Wang<sup>1</sup>, Lina Wang<sup>1</sup>, Xiaotong Zhu<sup>1</sup>, Ping Gao<sup>1</sup>,

8 Qianyun Xi<sup>1</sup>, Cong Yin<sup>1</sup>, Fan Li<sup>1</sup>, Guli Xu<sup>1</sup>, Yongliang Zhang<sup>1</sup>, Gang Shu<sup>1,2,\*†</sup>

9

10 **Appendix**

11

12

13

14

15

16

17

18

19

20

21

22

23

24

25

26

27

28

29

30

31

32

33

34

35

36

37

38

|    |                                                                                                      |    |
|----|------------------------------------------------------------------------------------------------------|----|
| 39 | <b>Contents</b>                                                                                      |    |
| 40 |                                                                                                      |    |
| 41 | <b>Appendix Figure S1:</b> The metabolic phenotype of OXGR1 KO mouse on normal chow.....             | 3  |
| 42 | <b>Appendix Figure S2.</b> Adrenal specific reexpression of OXGR1 rescues the stimulatory effects of |    |
| 43 | AKG on thermogenesis and lipolysis.....                                                              | 5  |
| 44 | <b>Appendix Figure S3.</b> Adrenal specific overexpression of OXGR1 enhances stimulatory effects of  |    |
| 45 | AKG on thermogenesis and lipolysis.....                                                              | 7  |
| 46 | <b>Appendix Table S1.</b> Clinical characteristics of all human subjects.....                        | 9  |
| 47 | <b>Appendix Table S2.</b> PCR primer sequences of related genes.....                                 | 10 |
| 48 |                                                                                                      |    |
| 49 |                                                                                                      |    |
| 50 |                                                                                                      |    |
| 51 |                                                                                                      |    |
| 52 |                                                                                                      |    |
| 53 |                                                                                                      |    |
| 54 |                                                                                                      |    |
| 55 |                                                                                                      |    |
| 56 |                                                                                                      |    |
| 57 |                                                                                                      |    |
| 58 |                                                                                                      |    |
| 59 |                                                                                                      |    |
| 60 |                                                                                                      |    |
| 61 |                                                                                                      |    |
| 62 |                                                                                                      |    |
| 63 |                                                                                                      |    |
| 64 |                                                                                                      |    |
| 65 |                                                                                                      |    |
| 66 |                                                                                                      |    |
| 67 |                                                                                                      |    |
| 68 |                                                                                                      |    |
| 69 |                                                                                                      |    |
| 70 |                                                                                                      |    |
| 71 |                                                                                                      |    |
| 72 |                                                                                                      |    |
| 73 |                                                                                                      |    |
| 74 |                                                                                                      |    |
| 75 |                                                                                                      |    |
| 76 |                                                                                                      |    |
| 77 |                                                                                                      |    |

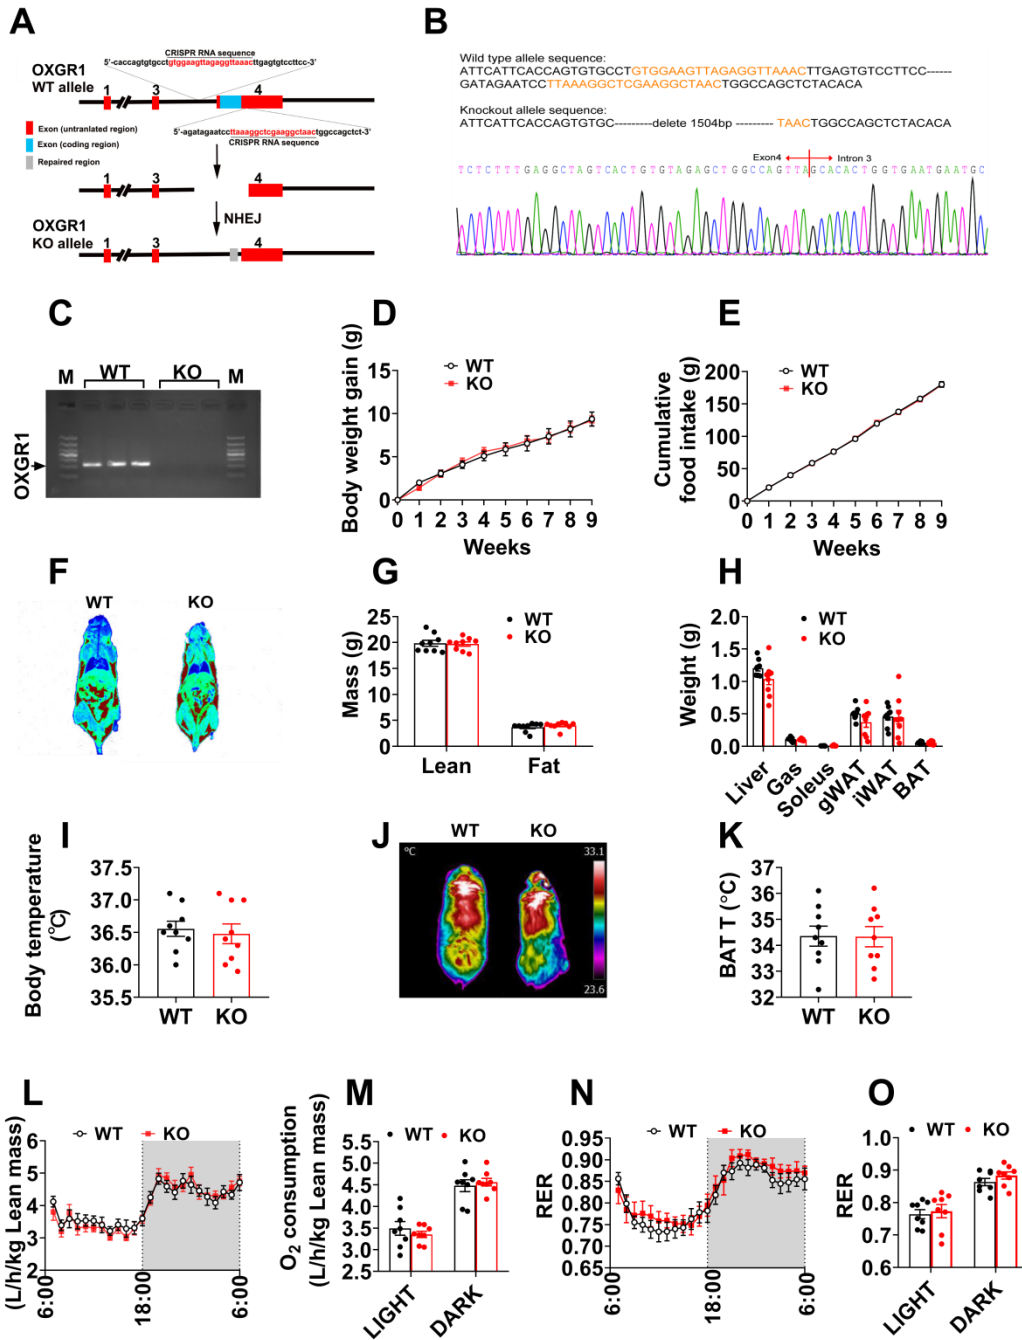

79

80 **Appendix Figure S1. The metabolic phenotype of OXGR1 KO mouse on normal chow**

81 (A). Schematic representation of OXGR1KO mouse line generation by Clustered Regularly  
82 Interspaced Short Palindromic Repeats (CRISPR) strategy. The sgRNA sites were located in intron  
83 3 and exon 4 of the OXGR1 gene. The DNA sequences contained sgRNA-binding regions are  
84 labeled with red.

85 (B). The genomic sequencing of sgRNA target sites in wild-type and OXGR1KO mice. The  
86 orange letter is the sgRNA target sequence.

87 (C). The validation of OXGR1KO mice. The mRNA expression of OXGR1 was determined in the  
88 adrenal glands from male WT control (littermates) or OXGR1KO mice.

89 (D-E). Body weight gain (D) and cumulative food intake (E) of male OXGR1 KO mice and  
90 littermates. Chow fed male mice (8 weeks of age) were monitored for 9 weeks (n = 8 per group).  
91 (F-H). Representative images (F) of body composition and fat and lean mass (G) and tissue weight  
92 (H) of male OXGR1KO mice after 9-weeks of monitoring (n = 8 per group).  
93 (I). The body temperature of male OXGR1KO mice after 9-weeks of monitoring (n = 8 per  
94 group).  
95 (J-K). Representative images (J) and quantification (K) of BAT thermogenesis induced by 6 hrs  
96 cold exposure at 4°C in male OXGR1KO mice after 9-weeks of monitoring (n = 8 per group).  
97 (L-O). Oxygen consumption (L-M) and RER (N-O) in male OXGR1KO mice after 9-weeks of  
98 monitoring (n = 8 per group).  
99 Data information: Results are presented as mean  $\pm$  SEM. In (D-E), (L) and (N) data was analyzed  
100 by two-way ANOVA followed by post hoc Bonferroni tests. In (G-I), (K), (M) and (O), data was  
101 analyzed by non-paired Student's t-test.  
102

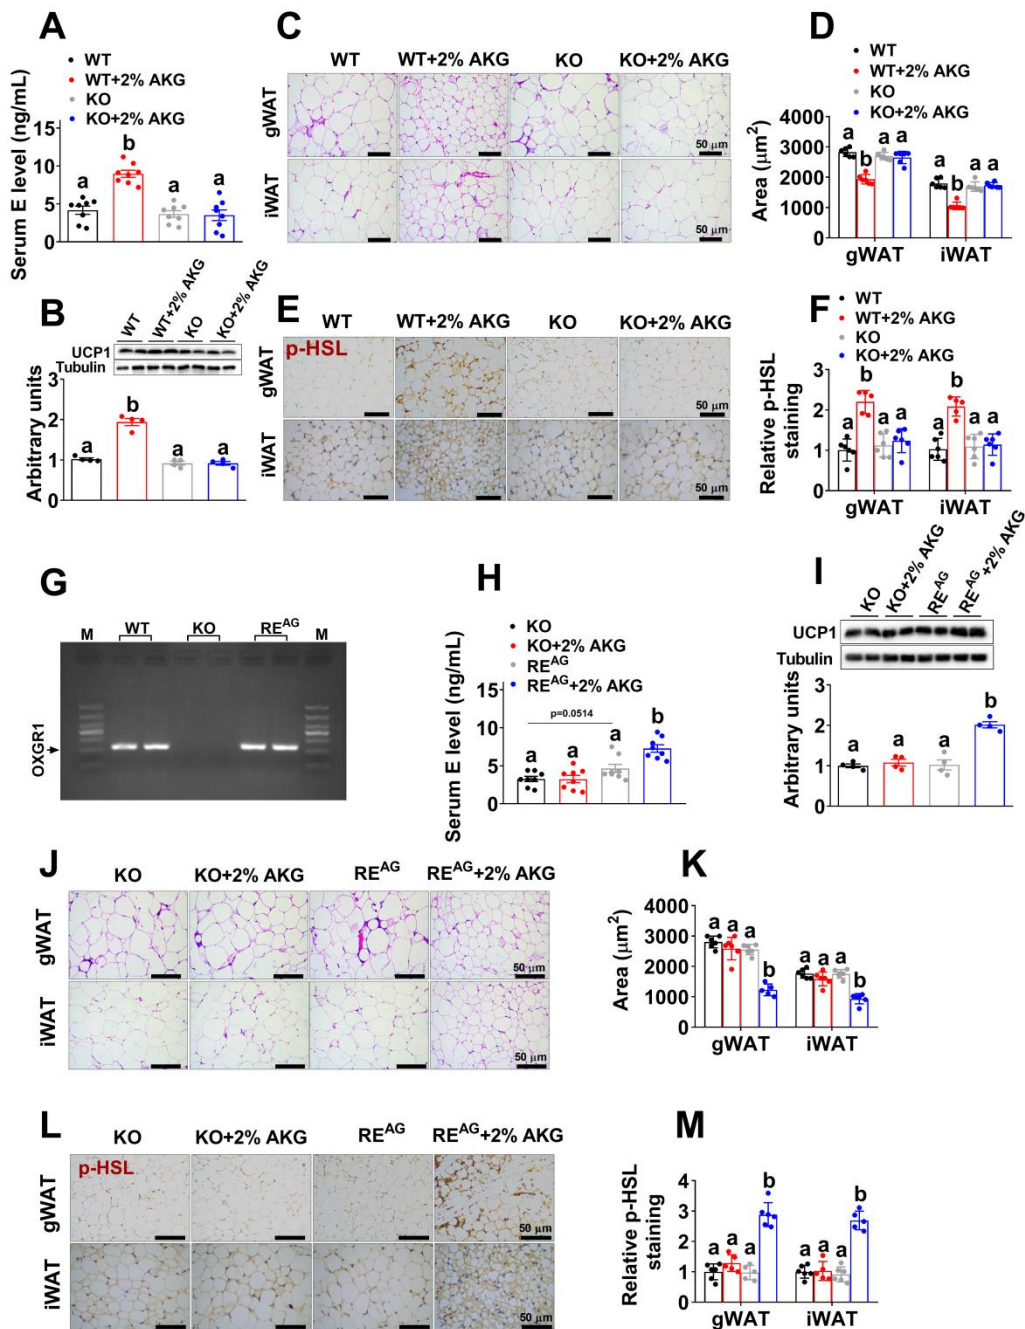

104

105 **Appendix Figure S2. Adrenal specific reexpression of OXGR1 rescues the stimulatory effects**  
 106 **of AKG on thermogenesis and lipolysis**

107 (A). Serum E level in male OXGR1KO mice. At 12 weeks of age, male control or OXGR1KO  
 108 mice were switched to HFD and received tap water or water supplemented with 2% AKG for 13  
 109 weeks (n = 8 per group).

110 (B). Immunoblots and quantification of UCP1 protein expression in the BAT of male OXGR1KO  
 111 mice treated with AKG for 13 weeks (n = 4 per group).

112 (C-D). Representative images (C) and quantification (D) of iWAT and gWAT HE staining from  
 113 male OXGR1KO mice treated with AKG for 13 weeks (n = 6 per group).

114 (E-F). Representative images (E) and quantification (F) of p-HSL DAB staining from male  
115 OXGR1KO mice treated with AKG for 13 weeks (n = 6 per group).  
116 (G). The validation of OXGR1 reexpression. The mRNA expression of OXGR1 was determined in  
117 the adrenal glands from male WT control, OXGR1KO injected with HBAAV2/9-GFP, and  
118 OXGR1KO injected with HBAAV2/9-OXGR1 (OXGR1RE<sup>AG</sup>) mice.  
119 (H). Serum E level in male OXGR1RE<sup>AG</sup>. Male OXGR1KO mice (8 weeks) were  
120 adrenal-specifically injected with control HBAAV2/9-GFP or HBAAV2/9-OXGR1. Two weeks  
121 after injections, mice were switched to HFD and further divided into two groups, receiving tap  
122 water or 2% AKG for 13 weeks. (n = 6 per group).  
123 (I). Immunoblots and quantification of UCP1 protein expression in the BAT of OXGR1RE<sup>AG</sup> mice  
124 treated with AKG for 13 weeks (n = 4 per group).  
125 (J-K). Representative images (J) and quantification (K) of iWAT and gWAT HE staining from  
126 OXGR1RE<sup>AG</sup> mice treated with AKG for 13 weeks (n = 6 per group).  
127 (L-M). Representative images (L) and quantification (M) of p-HSL DAB staining from  
128 OXGR1RE<sup>AG</sup> mice treated with AKG for 13 weeks (n = 6 per group).  
129 Data information: Results are presented as mean ± SEM. In (A-B), (D), (F), (H-I), (K) and (M),  
130 different letters between bars indicate p≤0.05 by one-way ANOVA followed by post hoc Turkey's  
131 tests.  
132

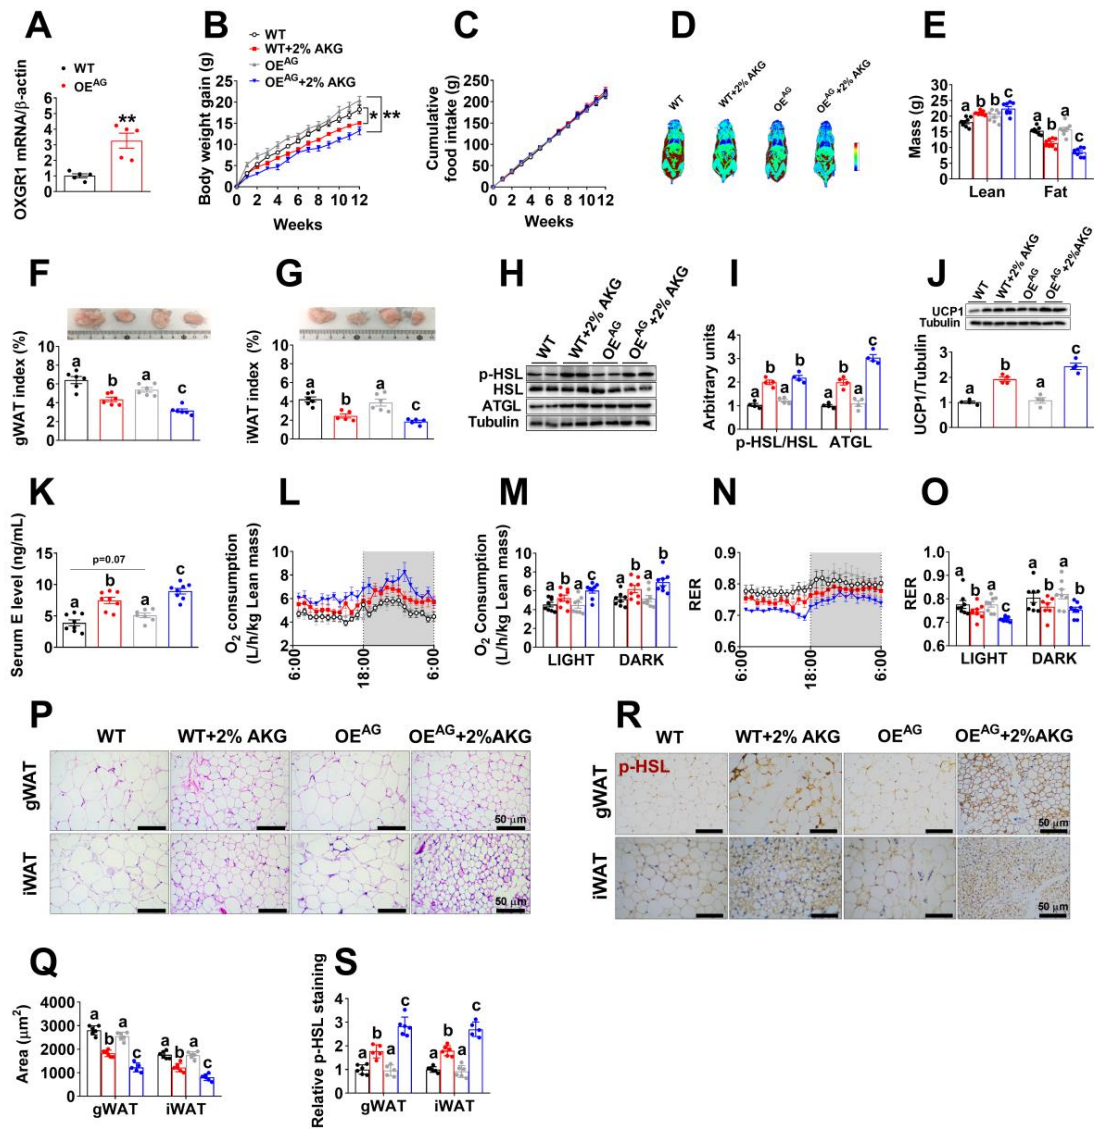

134

135 **Appendix Figure S3. Adrenal specific overexpression of OXGR1 enhances stimulatory**  
 136 **effects of AKG on thermogenesis and lipolysis**

137 (A). The validation of OXGR1 overexpression. The mRNA expression of OXGR1 was determined  
 138 in the adrenal glands from male WT control, WT injected with HBAAV2/9-GFP, and WT injected  
 139 with HBAAV2/9-OXGR1 (OXGR1OE<sup>AG</sup>) mice (n=5 per group).

140 (B-C). Body weight gain (B) and cumulative food intake (C) of OXGR1OE<sup>AG</sup>. Male C57BL/6  
 141 mice (8 weeks) were adrenal-specifically injected with control HBAAV2/9-GFP or  
 142 HBAAV2/9-OXGR1. Two weeks after injections, mice were switched to HFD and further divided  
 143 into two groups, receiving tap water or water supplemented with 2% AKG for 12 weeks (n = 8 per  
 144 group).

145 (D-E). Representative image of body composition (D) and fat and lean mass index (E) of male  
 146 OXGR1OE<sup>AG</sup> mice treated with AKG for 12 weeks (n = 8 per group).

147 (F-G). Weight index of gWAT (F) and iWAT (G) in male OXGR1OE<sup>AG</sup> mice treated with AKG for  
 148 12 weeks (n = 6 per group).

149 (H-I). Immunoblots (H) and quantification (I) of p-HSL and ATGL protein in the gWAT of male  
150 OXGR1OE<sup>AG</sup> mice treated with AKG for 12 weeks (n = 4 per group).

151 (J). Immunoblots and quantification of UCP1 protein in the BAT of male OXGR1OE<sup>AG</sup> mice  
152 treated with AKG for 12 weeks (n = 4 per group).

153 (K). Serum E level in male OXGR1OE<sup>AG</sup> mice treated with AKG for 12 weeks (n= 8 per group).

154 (L-O). Oxygen consumption (L-M) and RER (N-O) of male OXGR1OE<sup>AG</sup> mice treated with AKG  
155 for 12 weeks (n = 8 per group).

156 (P-Q). Representative images (P) and quantification (Q) of gWAT and iWAT HE staining from  
157 male OXGR1OE<sup>AG</sup> mice treated with AKG for 12 weeks (n = 6 per group).

158 (R-S). Representative images (R) and quantification (S) of p-HSL DAB staining from male  
159 OXGR1OE<sup>AG</sup> mice treated with AKG for 12 weeks (n = 6 per group).

160 Data information: Results are presented as mean ± SEM. In (A), \*\* p≤0.01 by non-paired  
161 Student's t test. In (B-C), \*p≤0.05, \*\*p≤0.01 by two-way ANOVA followed by post hoc  
162 Bonferroni tests. In (E-G), (I-K), (M), (O), (Q) and (S), different letters between bars indicate  
163 p≤0.05 by one-way ANOVA followed by post hoc Turkey's tests.

164

165

166

167

168

169

170

171

172

173

174

175

176

177

178

179

180

181

182

183

184

185

186

187

188

189

190

191

192



Appendix Table S1. Clinical characteristics of all human subjects.

| NO. | Gender | Age | Height (cm) | Weight (kg) | BMI (kg/m <sup>2</sup> ) | Fat mass (%) | VFA (cm <sup>2</sup> ) | NCF (cm) | WCF (cm) | HCF (cm) | Blood pressure (mmHg) |
|-----|--------|-----|-------------|-------------|--------------------------|--------------|------------------------|----------|----------|----------|-----------------------|
| 1   | F      | 48  | 154         | 61.7        | 26.02                    | 37.7         | 111.8                  | 33.9     | 85.9     | 99.3     | 113.5/91              |
| 2   | F      | 44  | 159.5       | 58.2        | 22.88                    | 31.6         | 80.6                   | 33.4     | 78.5     | 87.4     | 106/76                |
| 3   | F      | 47  | 160.5       | 63.4        | 24.61                    | 35.3         | 98.6                   | 36       | 80       | 95       | 114/82                |
| 4   | F      | 42  | 165.5       | 64.7        | 23.62                    | 35.3         | 96.1                   | 33.5     | 83.5     | 98.5     | 113.5/88              |
| 5   | F      | 40  | 176.5       | 75.3        | 24.17                    | 38.9         | 101.4                  | 33       | 83.5     | 104.5    | 113/78                |
| 6   | F      | 42  | 161         | 66.2        | 25.54                    | 38.9         | 105.2                  | 32.5     | 87       | 100.9    | 117/74                |
| 7   | F      | 36  | 168.5       | 89.8        | 31.63                    | 41.5         | 140.5                  | 37       | 96       | 113.5    | 159/107               |
| 8   | F      | 32  | 157.8       | 66          | 26.51                    | 37           | 89.1                   | 35.5     | 79       | 100      | 95/67                 |
| 9   | F      | 35  | 168         | 71.5        | 25.33                    | 32.1         | 87.8                   | 36.5     | 84.5     | 102      | 118/87                |
| 10  | F      | 36  | 164.7       | 75.5        | 27.83                    | 40.4         | 110.7                  | 34       | 84.5     | 109      | 112/74                |
| 11  | F      | 32  | 163         | 65.3        | 24.58                    | 30.1         | 74.8                   | 33.5     | 85       | 99.5     | 132/90.5              |
| 12  | F      | 28  | 160         | 66.2        | 25.86                    | 30.7         | 72.3                   | 34       | 86.5     | 97       | 109/71                |
| 13  | F      | 31  | 155.5       | 63.6        | 26.3                     | 40.1         | 97.9                   | 33.9     | 94       | 100      | 101/69                |
| 14  | F      | 29  | 170.5       | 71.6        | 24.63                    | 42.1         | 102.2                  | 34       | 80       | 105.5    | 105/75                |
| 15  | F      | 30  | 161.5       | 64          | 24.54                    | 34.4         | 74.8                   | 32.8     | 82.5     | 94       | 106/75                |
| 16  | F      | 31  | 161.3       | 71.9        | 27.64                    | 39.4         | 100                    | 34       | 92       | 106      | /                     |
| 17  | F      | 30  | 162.5       | 72.1        | 27.3                     | 36.8         | 98.9                   | 36.5     | 95       | 103.5    | 112/69                |
| 18  | F      | 27  | 164.5       | 70.1        | 25.91                    | 36.5         | 91.8                   | 33       | 86       | 105      | 126/82                |
| 19  | F      | 31  | 159         | 63.5        | 25.12                    | 36.8         | 76.1                   | 33.8     | 79.5     | 97.9     | /                     |
| 20  | F      | 29  | 174.8       | 87.5        | 28.64                    | 38.4         | 126.2                  | 38       | 99.5     | 112.5    | /                     |
| 21  | F      | 30  | 162.5       | 76.3        | 28.89                    | 41.5         | 108.6                  | 36       | 93.9     | 105      | 110/78                |
| 22  | F      | 27  | 161.7       | 61.8        | 23.64                    | 36.9         | 78.2                   | 33       | 76.2     | 96       | 123/82                |
| 23  | F      | 51  | 162         | 62.2        | 23.7                     | 34.7         | 98.4                   | 34       | 81.5     | 96.5     | 117/79                |
| 24  | F      | 49  | 160.5       | 63.6        | 24.69                    | 34           | 96.2                   | 33       | 83.5     | 98.2     | 130/82                |
| 25  | F      | 43  | 161.5       | 61.4        | 23.54                    | 35.2         | 100.1                  | 34       | 78.5     | 96       | 104/78                |
| 26  | F      | 49  | 163.5       | 69.9        | 26.15                    | 38.1         | 115.3                  | 33.9     | 86       | 103.5    | 115/78                |
| 27  | F      | 29  | 160         | 68.8        | 26.88                    | 42.7         | 98                     | 34.5     | 88       | 102.9    | 108/65                |
| 28  | F      | 46  | 162.2       | 69.5        | 26.42                    | 43.4         | 126.8                  | 35.5     | 92.5     | 104.5    | 120/80                |
| 29  | F      | 29  | 169.5       | 80.1        | 27.88                    | 36.2         | 106.5                  | 34.9     | 93.5     | 106      | 114/66                |
| 30  | F      | 38  | 158         | 81.5        | 32.65                    | 40.6         | 144.7                  | 37       | 99.5     | 110.5    | 124/87                |
| 31  | F      | 46  | 167.8       | 77.2        | 27.42                    | 35.5         | 123.6                  | 37.5     | 91       | 106.5    | 116/77                |
| 32  | F      | 47  | 156.2       | 59.3        | 24.3                     | 33.2         | 90.5                   | 31       | 72.5     | 98.7     | 88/61                 |
| 33  | F      | 43  | 156.3       | 70.8        | 28.98                    | 41.4         | 126.1                  | 37       | 87.5     | 100      | 123/88                |
| 34  | M      | 43  | 170         | 78          | 27                       | /            | /                      | /        | /        | /        | /                     |
| 35  | F      | 57  | 150         | 50          | 22                       | /            | /                      | /        | /        | /        | /                     |
| 36  | M      | 61  | 168         | 58          | 20.5                     | /            | /                      | /        | /        | /        | /                     |
| 37  | M      | 44  | 163         | 62          | 23.3                     | /            | /                      | /        | /        | /        | /                     |
| 38  | M      | 52  | 145         | 49.5        | 23.5                     | /            | /                      | /        | /        | /        | /                     |
| 39  | M      | 24  | 160         | 61          | 23.8                     | /            | /                      | /        | /        | /        | /                     |
| 40  | M      | 45  | 160         | 65          | 25.3                     | /            | /                      | /        | /        | /        | /                     |
| 41  | M      | 71  | 161         | 81          | 31.2                     | /            | /                      | /        | /        | /        | /                     |
| 42  | M      | 57  | 174         | 77.5        | 25.6                     | /            | /                      | /        | /        | /        | /                     |
| 43  | M      | 76  | 167         | 65          | 23.3                     | /            | /                      | /        | /        | /        | /                     |
| 44  | M      | 37  | 151         | 51.3        | 22.5                     | /            | /                      | /        | /        | /        | /                     |
| 45  | F      | 82  | 157         | 60          | 24.3                     | /            | /                      | /        | /        | /        | /                     |

BMI: body mass index as the body mass divided by the square of the body height; VFA: visceral fat area; NCF: neck circumference; WCF: waist circumference; HCF: hip circumference.

194  
195  
196  
197  
198  
199  
200  
201  
202  
203  
204  
205  
206  
207  
208  
209

| Gene abbreviation | Forward Primer (5'-3')       | Reverse Primer (5'-3')       |
|-------------------|------------------------------|------------------------------|
| UCP1              | ACTGCCACACCTCCAGTCATT        | CTTTGCCTCACTCAGGATTGG        |
| Cidea             | TGCTCTTCTGTATCGCCCAGT        | GCCGTGTTAAGGAATCTGCTG        |
| Dio2              | AATTATGCCTCGGAGAAGACCG       | GGCAGTTGCCTAGTGAAAGGT        |
| ATGL              | ACACCAGCATCCAGTTCAACCT<br>TC | GACATCAGGCAGCCACTCCAAC       |
| HSL               | CTCCTCATGGCTCAACTCC          | ACTCCTGCGCATAGACTCC          |
| PPAR $\gamma$     | GGAAGACCACTCGCATTCTT         | GTAATCAGCAACCATTGGGTCA       |
| FASN              | CTCCAAGCAGGCGAACACG          | CGAAGGGAAGCAGGGTTGAT         |
| ACC               | TGATTCTCAGTTCGGGCACT         | CTCTGCCTGCACTTTCTCTG         |
| CD137             | CACGGAGCTCATCTCTTGGT         | GTCCACCTATGCTGGAGAAGG        |
| TBX1              | TGGGACGAGTTCAATCAGCT         | CACAAAGTCCATCAGCAGCA         |
| TMEM26            | ACCCTGTCATCCCACAGAG          | TGTTTGGTGGAGTCCTAAGGTC       |
| slc27a1           | CGCTTTCTGCGTATCGTCTG         | GATGCACGGGATCGTGTCT          |
| CD40              | TTGTTGACAGCGGTCCATCTA        | CCATCGTGGAGGTACTGTTTG        |
| CITED1            | GAGGCCTGCACTTGATGTC          | CACGGAGCTCATCTCTTGGT         |
| JMJD3             | CACCCCAGCAAACCATATTATGC      | CACACAGCCATGCAGGGATT         |
| OXGR1             | CTGCCTGCCATTGGTGATAGTGA<br>C | TGCCTGCTGGAAGTTATTGCTGA<br>C |
| PHD1              | AAGTGGTATGGGCTGTGACA         | GTCAACATGCCTCACGTACC         |

211

212

213

---

|                |                              |                              |
|----------------|------------------------------|------------------------------|
| PHD2           | AGGCAACGGAACAGGCTATG         | CGCATCTTCCATCTCCATTTG        |
| PHD3           | ACCTGCAGACGACATCCTAG         | TGTGAGGGTTTGGAGGGTAC         |
| OCT4           | GAGGAGTCCCAGGACATGAA         | AGATGGTGGTCTGGCTGAAC         |
| ASZ1           | AAGTGCTTGTTCTGCTCGTG         | CATCCTGGGCGTTAACTTCG         |
| Wfdc15a        | TGAAGCCAAGCAGCCTCCTA         | AGGTTGTCCAGGGTTCCACA         |
| TET1           | AGCTACCCTGAGTTTCACCC         | CAATTAGGCGCTGTCTGTCC         |
| TET2           | TGTGTGGCACTAGATTTTCAT        | AGTCTCTGAAGCCTGTTGAT         |
| TET3           | CAGTGGCTTCTTGGAGTCACCT<br>C  | GGATGGCTTCCCCTTCTCTCC        |
| Dazl           | TGCAGCCTCCAACCATGATGAA<br>TC | CACTGTCTGTATGCTTCGGTCCA<br>C |
| UTX            | AAGGCTGTTCGCTGCTACG          | GGATCGACATAAAGCACCTCC        |
| $\beta$ -actin | CCACTGGCATCGTGATGGACTC<br>C  | GCCGTGGTGGTGAAGCTGTAGC       |

---

214  
215  
216  
217  
218  
219  
220  
221  
222  
223  
224  
225  
226  
227
